# Supplementary material for: Functional and Promoter Analysis of ChiIV3, a Chitinase of Pepper Plant, in Response to Phytophthora capsici Infection
Source: PubMed Central journal article supplement (PMC5578051; doi:10.3390/ijms18081661), 2017-08-01
Supplement: ijms-18-01661-s001.pdf [file ijms-18-01661-s001.pdf]

## Supplementary Material

# Functional and promoter analysis of *ChiIV3*, a chitinase of pepper plant, in response to *Phytophthora capsici* infection

### Supplementary Figures

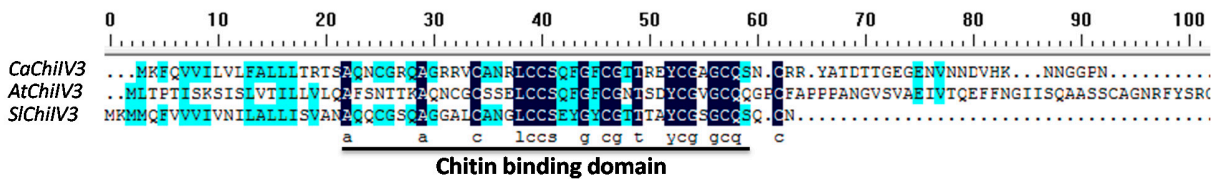

**Figure S1.** Comparison of predicted amino acid sequence between ChiIV3 (CaChiIV3) and its homologues from Arabidopsis and tomato.

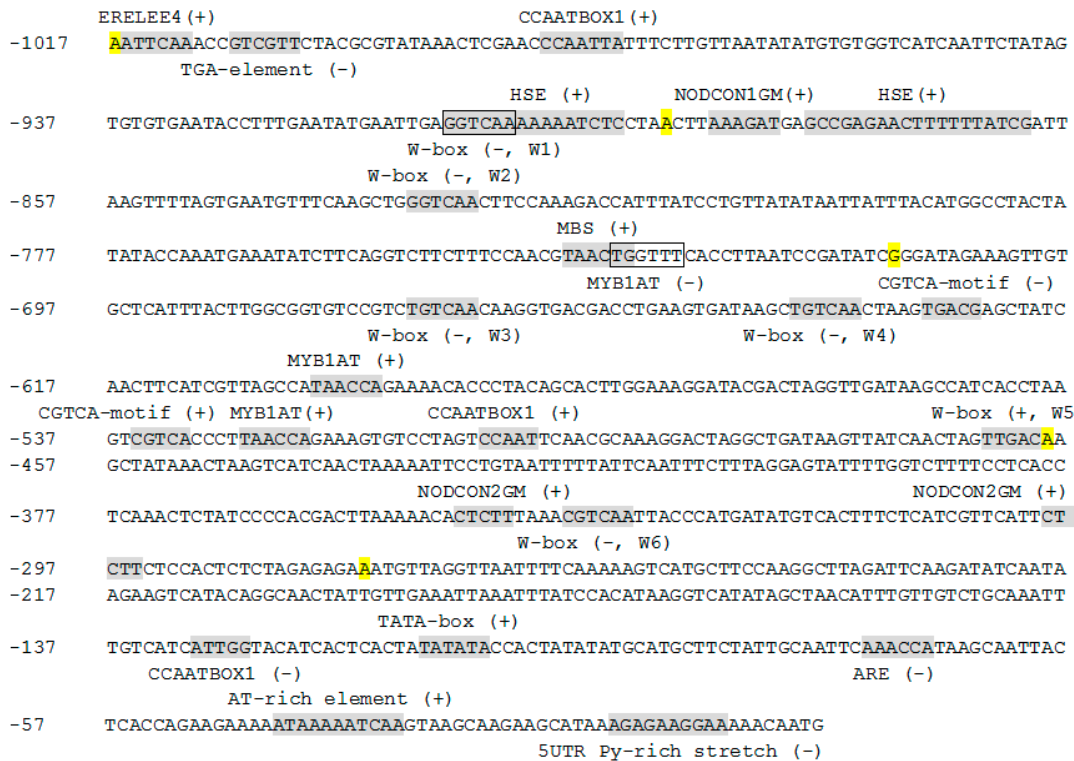

**Figure S2.** Nucleotide sequence of 5'-flanking promoter regions of *ChiIV3* gene and the distributions of the potential *cis*-acting elements. The nucleotide in yellow and grey background represents the position of promoter deletions and the core nucleotides of the *cis*-element. 5UTR Py-rich stretch, *cis*-acting element conferring high transcription levels; ARE, *cis*-acting regulatory element essential for the anaerobic induction; AT-rich element, binding site of AT-rich DNA binding protein (ATBP-1);

Box-W1/W-box, Fungal elicitor responsive element; elicitation, wounding and pathogen responsiveness, binds WRKY type transcription factors; CCAATBOX1, "CCAAT box" act cooperatively with HSEs to increase the hs promoter activity; CGTCA-motif, *cis*-acting regulatory element involved in the MeJA-responsiveness; HSE, *cis*-acting element involved in heat stress responsiveness; MBS, MYB binding site involved in drought-inducibility; MYB1AT, MYB recognition site found in the promoters of the dehydration-responsive gene *rd22* and many other genes in *Arabidopsis*; TGA-element, Auxin-responsive element.

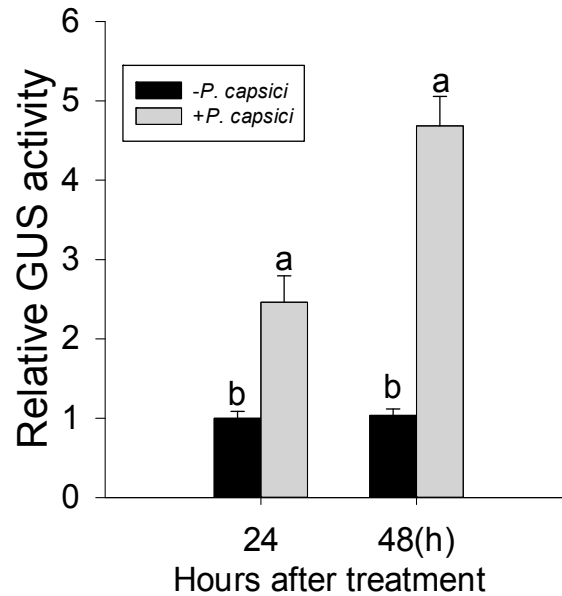

**Figure S3.** Expression of GUS driven by *pChiIV3* against *P. capsici* inoculation in pepper leaves. The GUS activities measurement of pepper leaves transiently expressed *pChiIV3:GUS* 24 and 48 h after *P. capsici* inoculation. The 8-week-old pepper leaves were infiltrated with GV3101 cells harboring the reporter vector (*pChiIV3:GUS*) and were maintained in the greenhouse. 24 hours later, the *Agro*-infiltrated pepper leaves were inoculated with 10  $\mu$ L *P. capsici* zoospores (OD<sub>595</sub>=0.6) and were again kept in the greenhouse. 24 and 48 hours later, the *P. capsici*-inoculated pepper leaves were harvested for GUS activity quantification. The GUS activity of mock-treated pepper leaves (without *P. capsici* inoculation) were set to "1". Error bars indicate means  $\pm$  SD. Different letters indicate significant differences determined by student's *t* test ( $P < 0.05$ ).

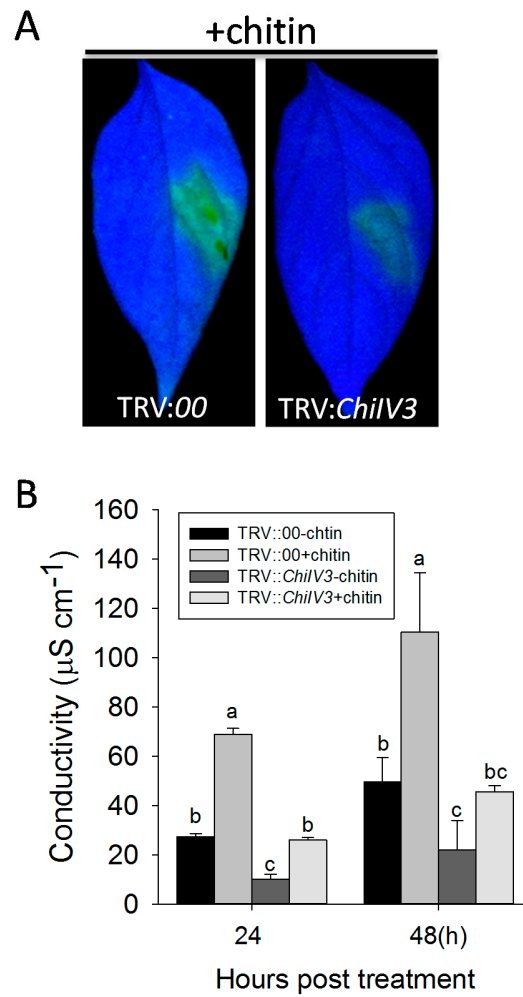

**Figure S4.** *ChiIV3*-silencing suppressed the immunity response triggered by applied chitin in pepper plants. (A) The maximal photochemical quantum efficiency of photosystem II of unsilenced or *ChiIV3*-silenced pepper leaves ( $F_v/F_m$ ) was monitored at 24 h after applied chitin treatment with imaging pulse amplitude modulation (PAM) to assess the changes in tolerance. (B) The conductivity of unsilenced or *ChiIV3*-silenced pepper leaves was measured at 24 and 48 h after applied chitin treatment. Values are means  $\pm$  SD ( $n = 6$ ). Different letters indicate significant differences determined by student's LSD test.

## Supplementary Tables

Table S1. Oligonucleotides for plasmid constructs used in this study.

| Analysis                                     | Gene                          | Sequence of the oligonucleotide                             |
|----------------------------------------------|-------------------------------|-------------------------------------------------------------|
| Isolation of ChiIV3 promoter                 | GSPa                          | 5'-CCGCCATTATTCTTGTGTAC-3'                                  |
|                                              | GSPb                          | 5'-ATTCCCTAGTCGTACCACAG-3'                                  |
|                                              | GSPc                          | 5'-CAATTTTGAGCACTTGTCT-3'                                   |
| Overexpression<br>/Subcellular localization  | ChiIV3 F                      | 5'-GGGACAAGTTTGTACAAAAAAGCAGGCTTCATGAAGTT TCAGGTGGTA ATT-3' |
|                                              | ChiIV3 R                      | 5'-GGGGACCACTTTGTACAAGAAAGCTGGGTCTTAGTTGGGACCGCCATTATT-3'   |
| VIGS                                         | ChiIV3-VIGS F                 | 5'-GGGACAAGTTTGTACAAAAAAGCAGGCTTCTAGGGAATACTGTGGAG-3'       |
|                                              | ChiIV3-VIGS R                 | 5'-GGGGACCACTTTGTACAAGAAAGCTGGGTCAAAGTTGAACAACGAGCT-3'      |
| deletion of pChiIV3                          | p1017 F                       | 5'-GGGACAAGTTTGTACAAAAAAGCAGGCTTCAATTCAAACCGTCTTCTACG-3'    |
|                                              | p891 F                        | 5'-GGGACAAGTTTGTACAAAAAAGCAGGCTTCACTTAAAGATGAGCCGAGAAC-3'   |
|                                              | p712 F                        | 5'-GGGACAAGTTTGTACAAAAAAGCAGGCTTCGGGATAGAAAGTTGTGCTCAT-3'   |
|                                              | p459 F                        | 5'-GGGACAAGTTTGTACAAAAAAGCAGGCTTCAAGCTATAAACTAAGTCATCAA-3'  |
|                                              | p276 F                        | 5'-GGGACAAGTTTGTACAAAAAAGCAGGCTTCAATGTTAGGTTAATTTTCAA-3'    |
|                                              | pChiIV3 R                     | 5'-GGGGACCACTTTGTACAAGAAAGCTGGGTCTGTTTTCTTCTTTATGCT-3'      |
| Mutations construction of<br>ChiIV3 promoter | pChiIV3-W3m-F                 | 5'-CCGCCATTATTCTTGTGTAC-3'                                  |
|                                              | pChiIV3-W4m-F                 | 5'-ATTCCCTAGTCGTACCACAG-3'                                  |
|                                              | pChiIV3-W5m-F                 | 5'-CAATTTTGAGCACTTGTCT-3'                                   |
| Prokaryotic expression                       | ChiIV3-PE-F ( <i>Bam</i> H I) | 5'-CGGGATCCATGAAGTTTCAGGTGGTAATT-3                          |
|                                              | ChiIV3-PE-R ( <i>Xho</i> I)   | 5'-CCGCTCGAGTTAGTTGGGACCGCCATTATT-3                         |

**Table S2.** Primers used in the qPCR and the validation of qPCR.

| Gene                     | Accession no.  | Forward primers               | Reverse primers                   | Length of PCR product | Specificity screen NCBI | Peak number of Melting curve | Ct of the no-template controls | slope  | PCR efficiency(%) | y intercept | R <sup>2</sup> |
|--------------------------|----------------|-------------------------------|-----------------------------------|-----------------------|-------------------------|------------------------------|--------------------------------|--------|-------------------|-------------|----------------|
| <i>ChlV3</i>             | EU401721       | 5'-TAGGGAACTACTGTGGAG-3'      | 5'-AAAGTTGAACAACGAGCT-3'          | 213                   | specific product        | 1                            | N/A                            | -3.401 | 0.968027521       | 33.453      | 0.950          |
| <i>ABRY</i>              | GQ373000       | 5'-ATGACAGCCACACAGAGAAAT-3'   | 5'-CAGCTCCATAACCGCAGCAGC-3'       | 108                   | specific product        | 1                            | N/A                            | -3.367 | 0.981526361       | 32.987      | 0.995          |
| <i>HFR1</i>              | AY526867       | 5'-GACATGGTCTGTGGTAACCCA-3'   | 5'-CCCACAGAGCCCTGAGAA-3'          | 150                   | specific product        | 1                            | N/A                            | -3.321 | 1.00367455        | 32.819      | 0.961          |
| <i>DEFF</i>              | AF442388       | 5'-CAAGGGAGTATGCTAGTAGAGAC-3' | 5'-TGCACAGACTATCATTGCATAC-3'      | 267                   | specific product        | 1                            | N/A                            | -3.423 | 0.959482533       | 30.912      | 0.983          |
| <i>BPR1</i>              | AF063343       | 5'-CAGGATGCAACACTCTGGTGG-3'   | 5'-ATCAAAGCGCGTTGGTC-3'           | 310                   | specific product        | 1                            | N/A                            | -3.346 | 0.9900515         | 32.432      | 0.993          |
| <i>PR1</i>               | AF348141.1     | 5'-GCCGTGAAGATGGGTCAATGA-3'   | 5'-TGAGTTACCCCGACTACCTGAGTA-3'    | 108                   | specific product        | 1                            | N/A                            | -3.379 | 0.976721773       | 33.257      | 0.994          |
| <i>PO2</i>               | DQ489711       | 5'-TGAATGCTTTGTCAGGGTT-3'     | 5'-ATGATGGACTCCACAGAGA-3'         | 224                   | specific product        | 1                            | N/A                            | -3.315 | 1.002899348       | 35.884      | 0.999          |
| <i>CaACT1N</i>           | GQ339766(NCBI) | 5'-CCTCTCAACCCTAAGGCCAACAG-3' | 5'-ACGTCCAGCAAGATCCAAACGAA-3'     | 225                   | specific product        | 1                            | N/A                            | -3.321 | 1.00387455        | 35.521      | 0.995          |
| <i>18S ribosomal RNA</i> | EF564281(NCBI) | 5'-CGGGTCGGCCTATGCTGTGTC-3'   | 5'-GAGTGTGTGCTTTCATTAATCCAAGAA-3' | 285                   | specific product        | 1                            | N/A                            | -3.320 | 1.00805255        | 35.632      | 0.993          |
